# Supplementary material
Source: PubMed Central journal article supplement (PMC8219245)
Supplement: NIHMS1653610-supplement-2.pdf [file NIHMS1653610-supplement-2.pdf]

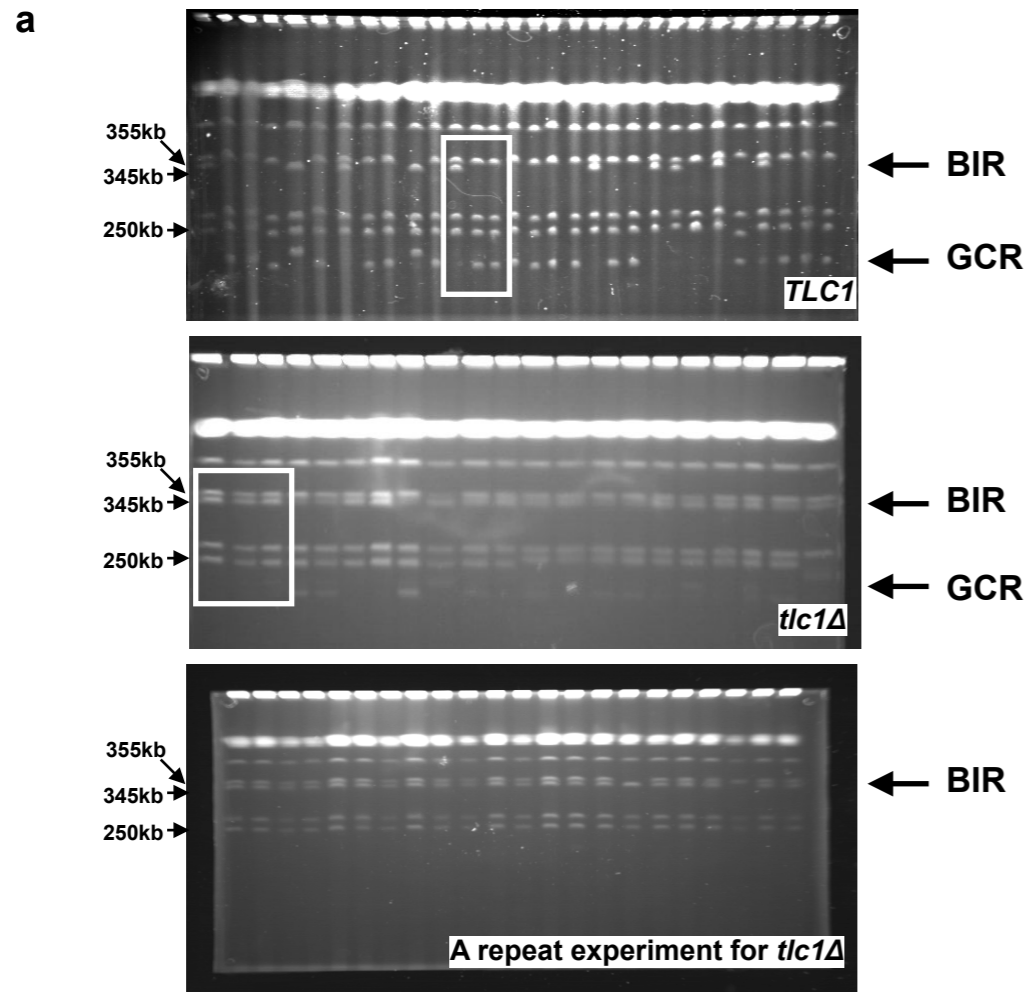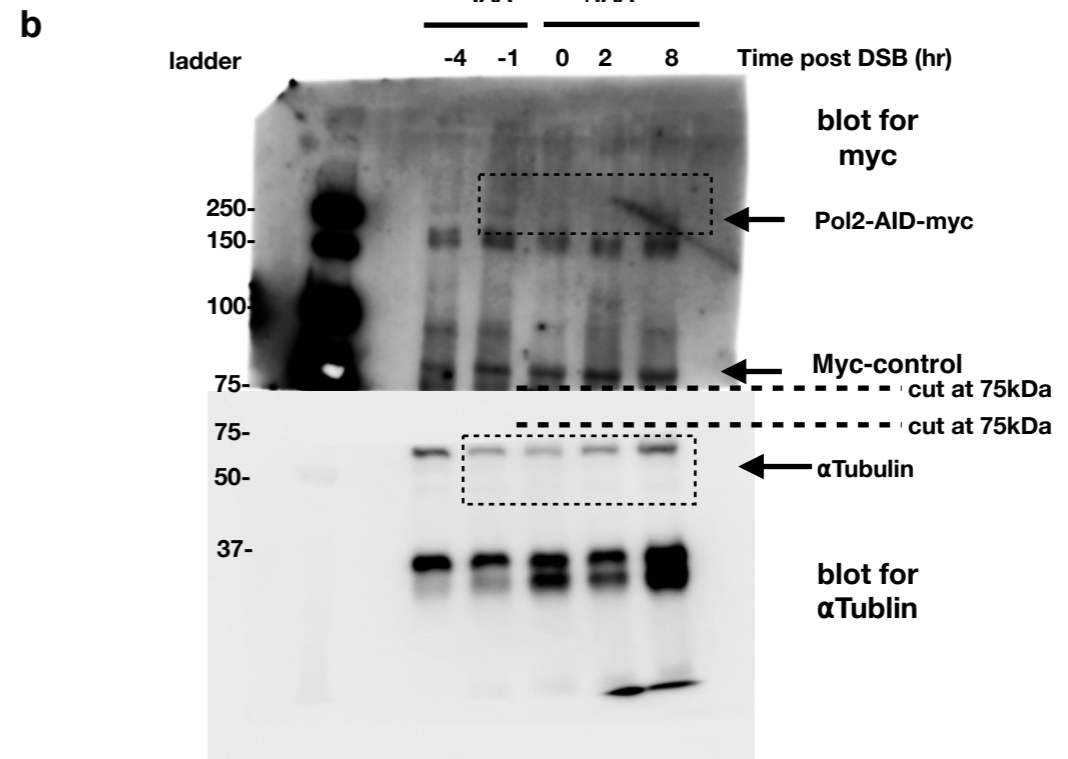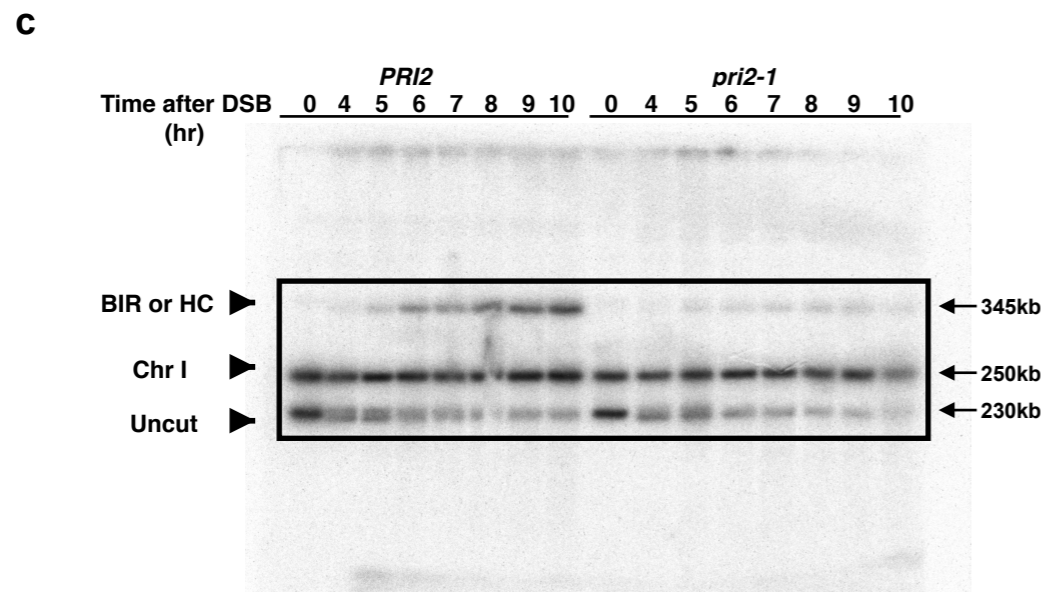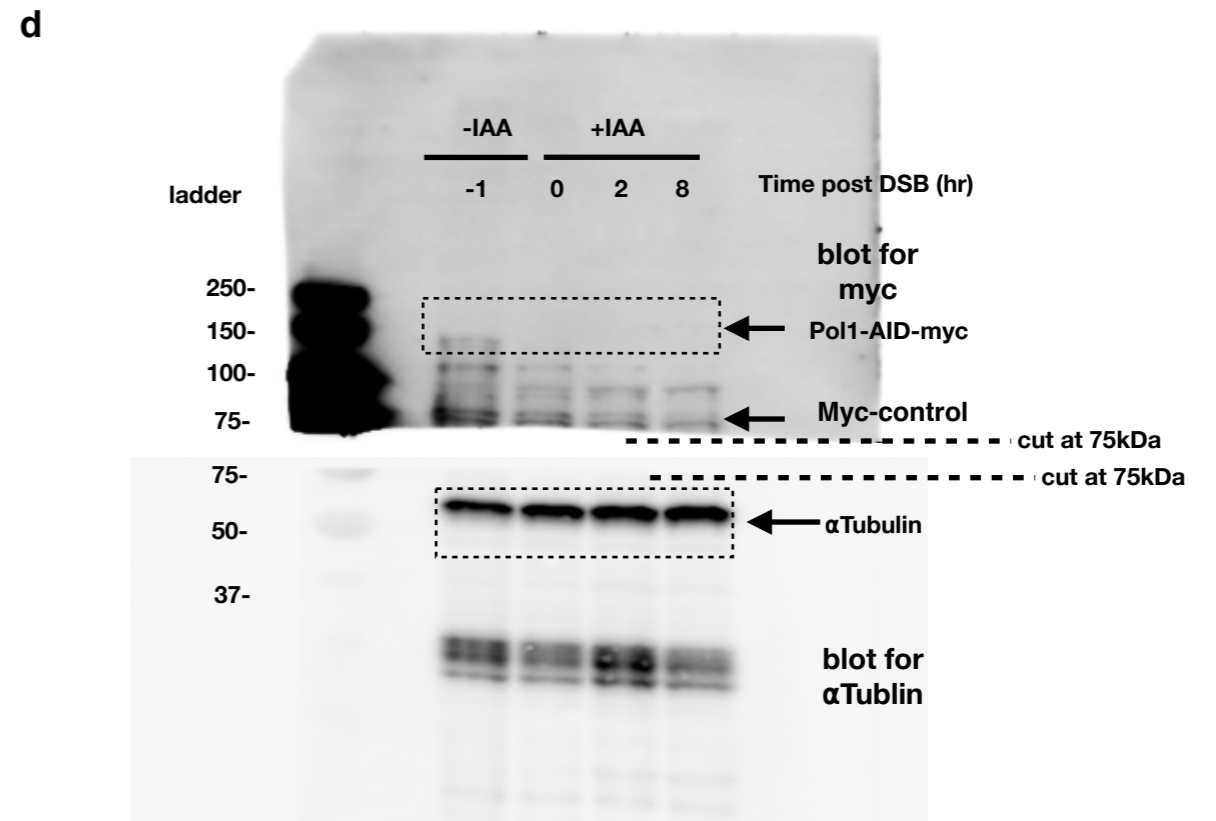

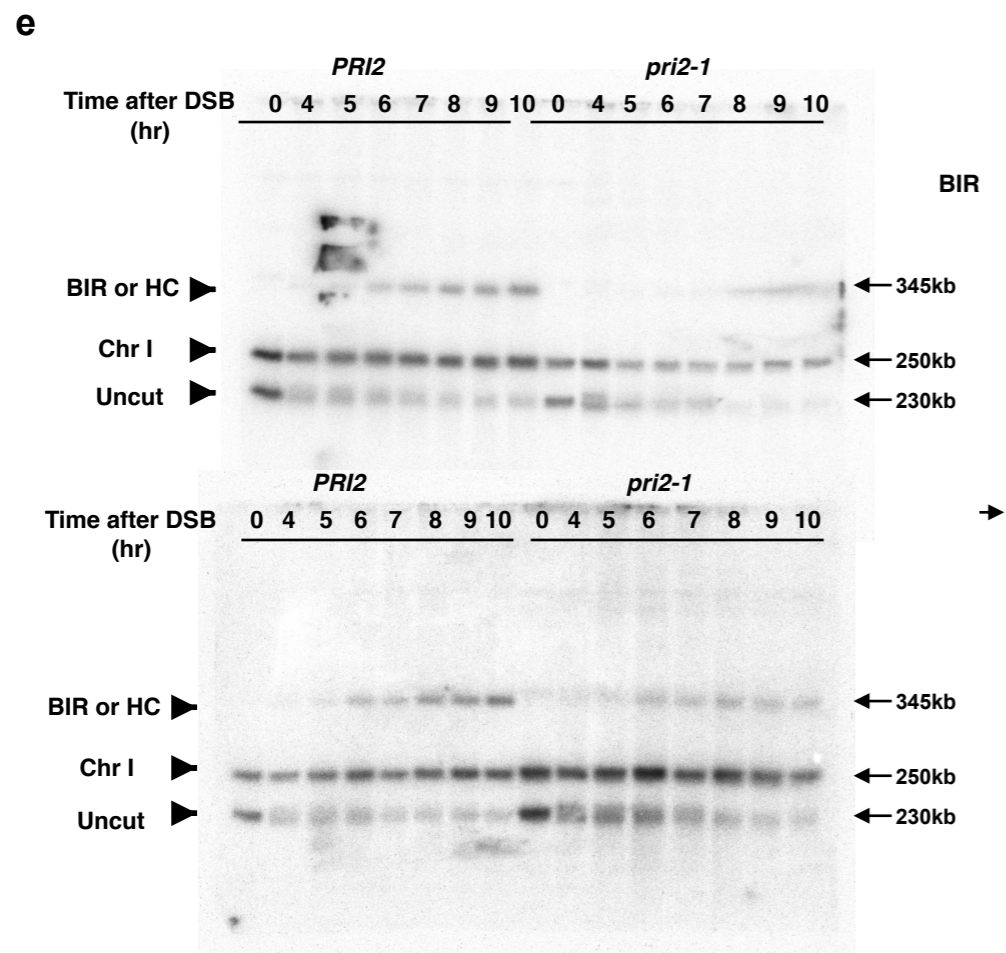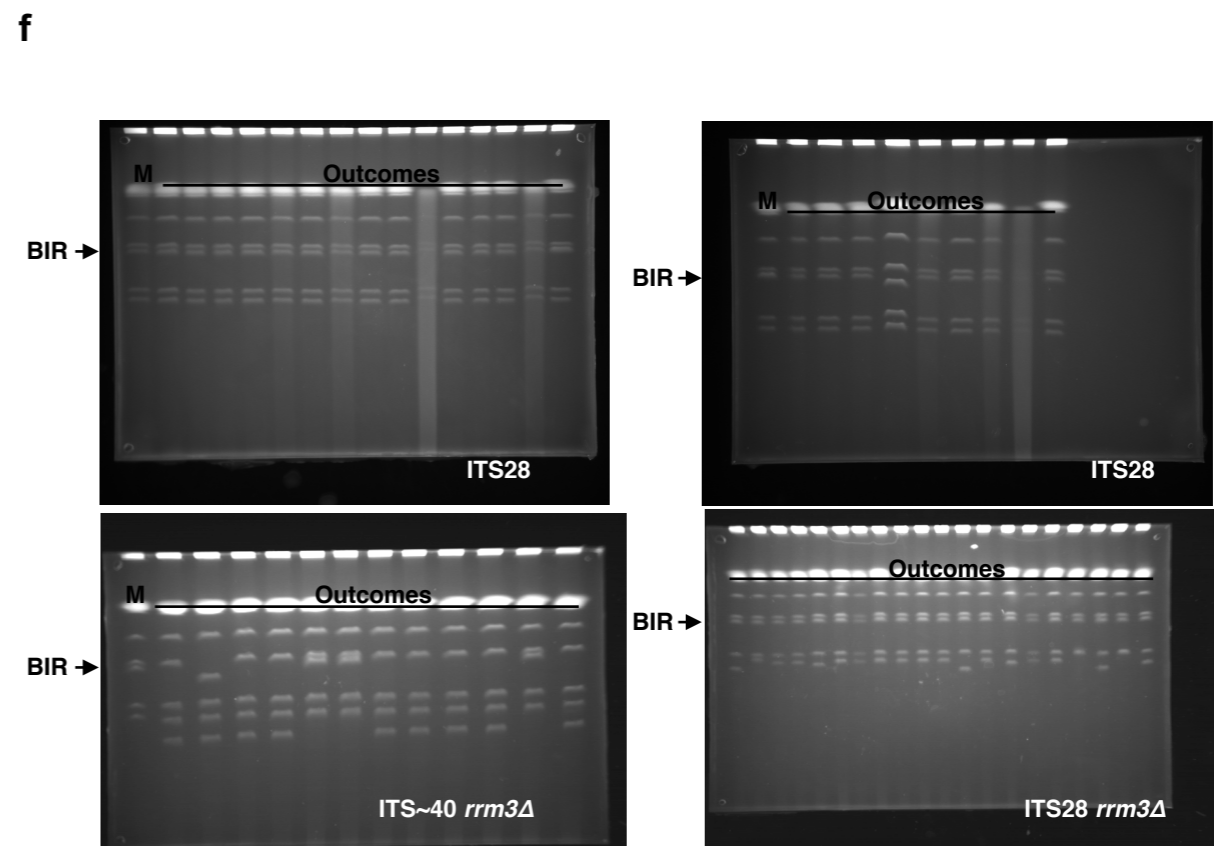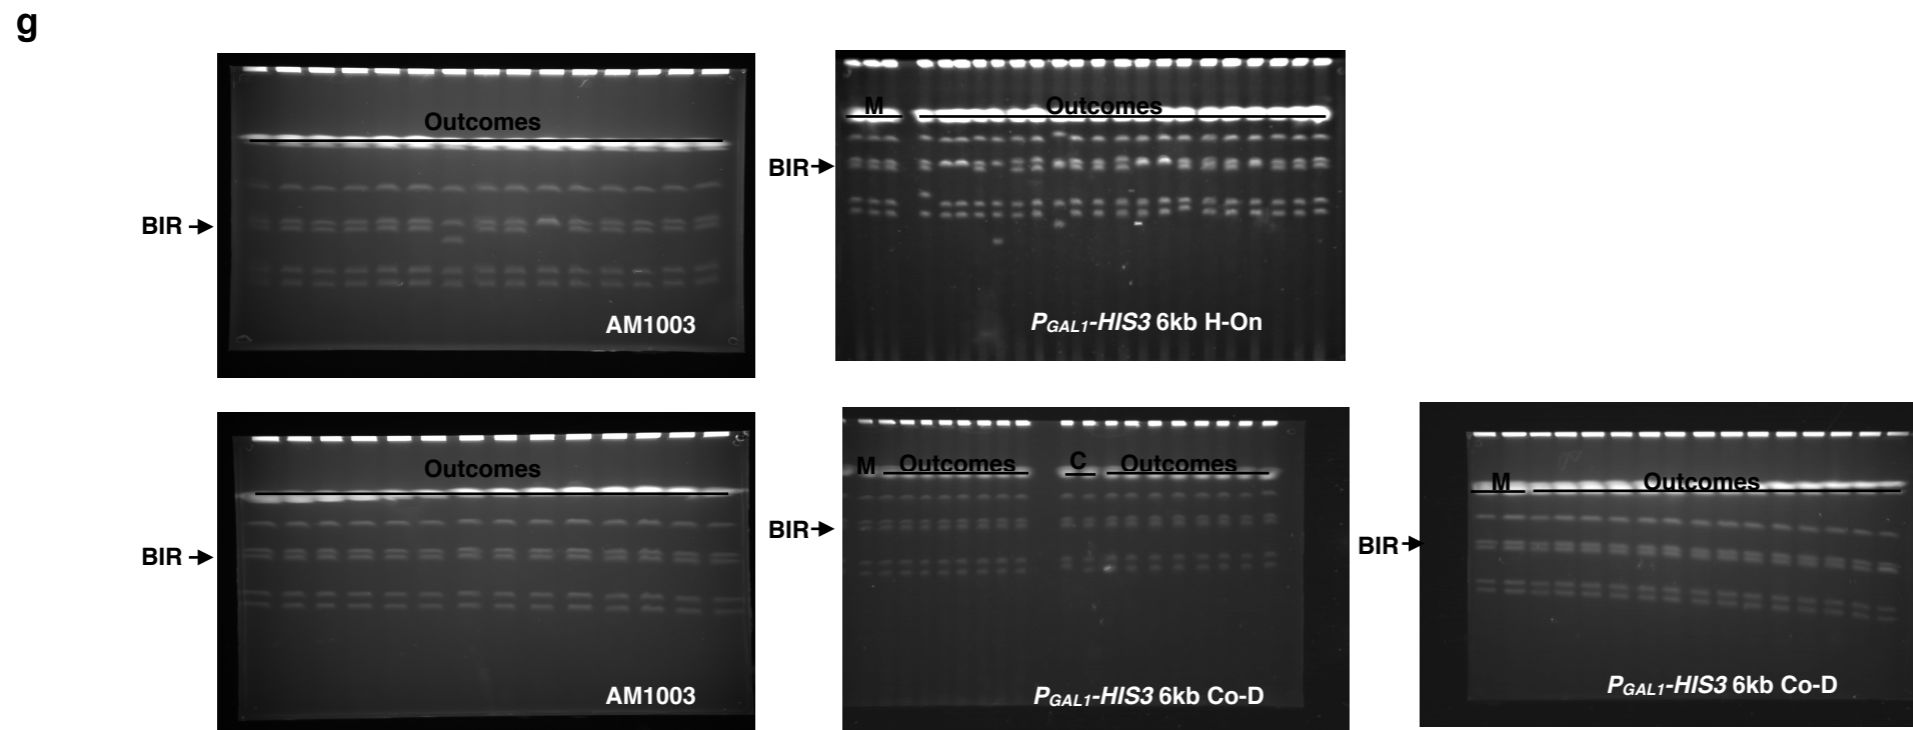

M: normal BIR outcome from AM1003 was used as a control of successful BIR repair and as a marker (M) to show chromosome size.

**h**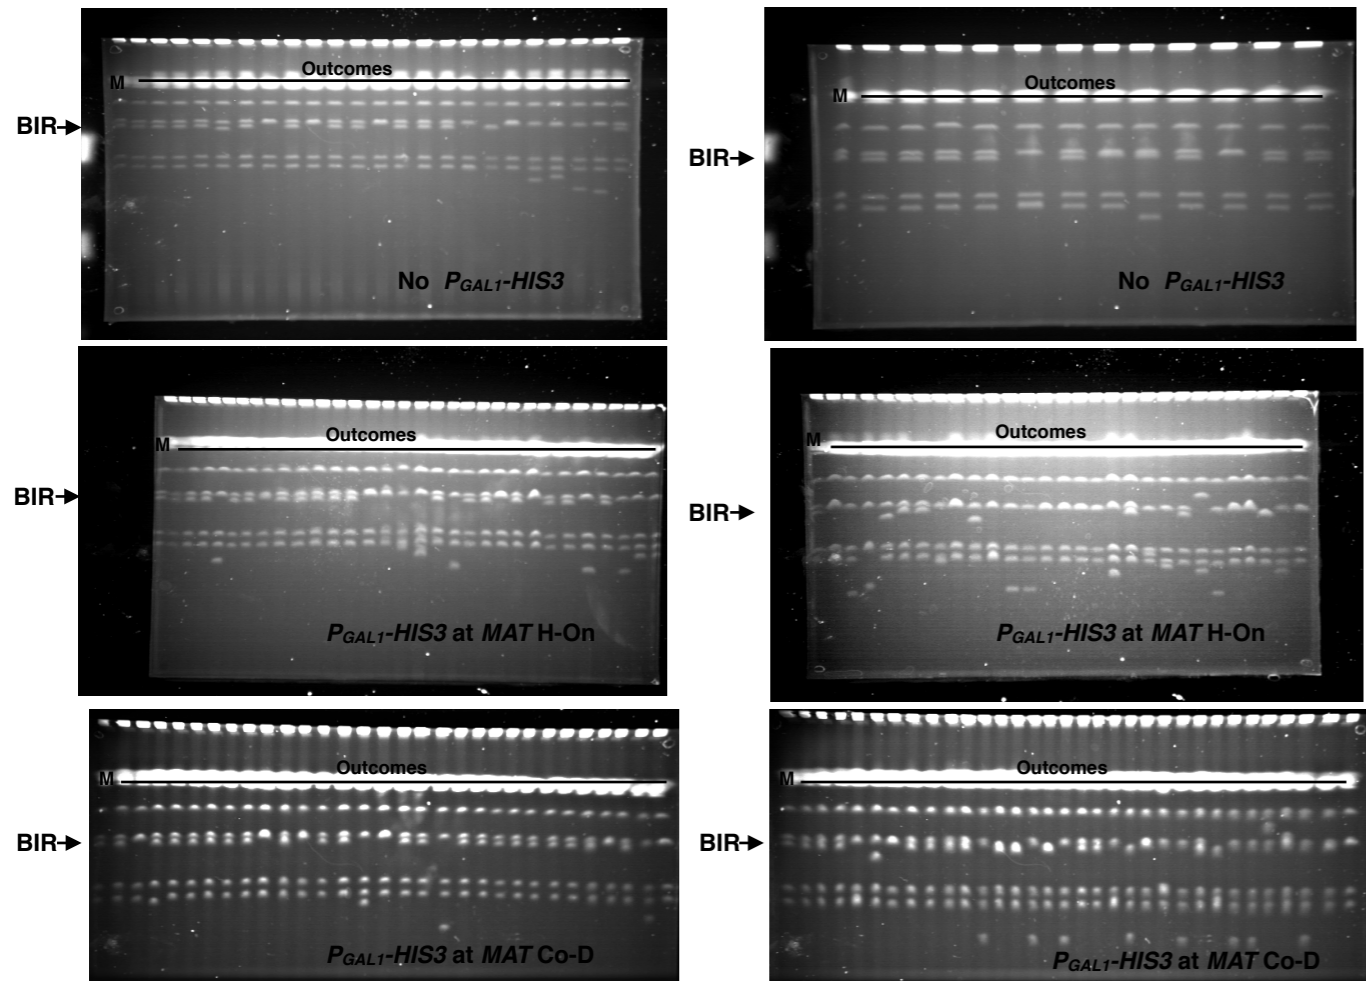

**M:** normal BIR outcome from AM1003 was used as a control of successful BIR repair and as a marker (M) to show chromosome size.

**i**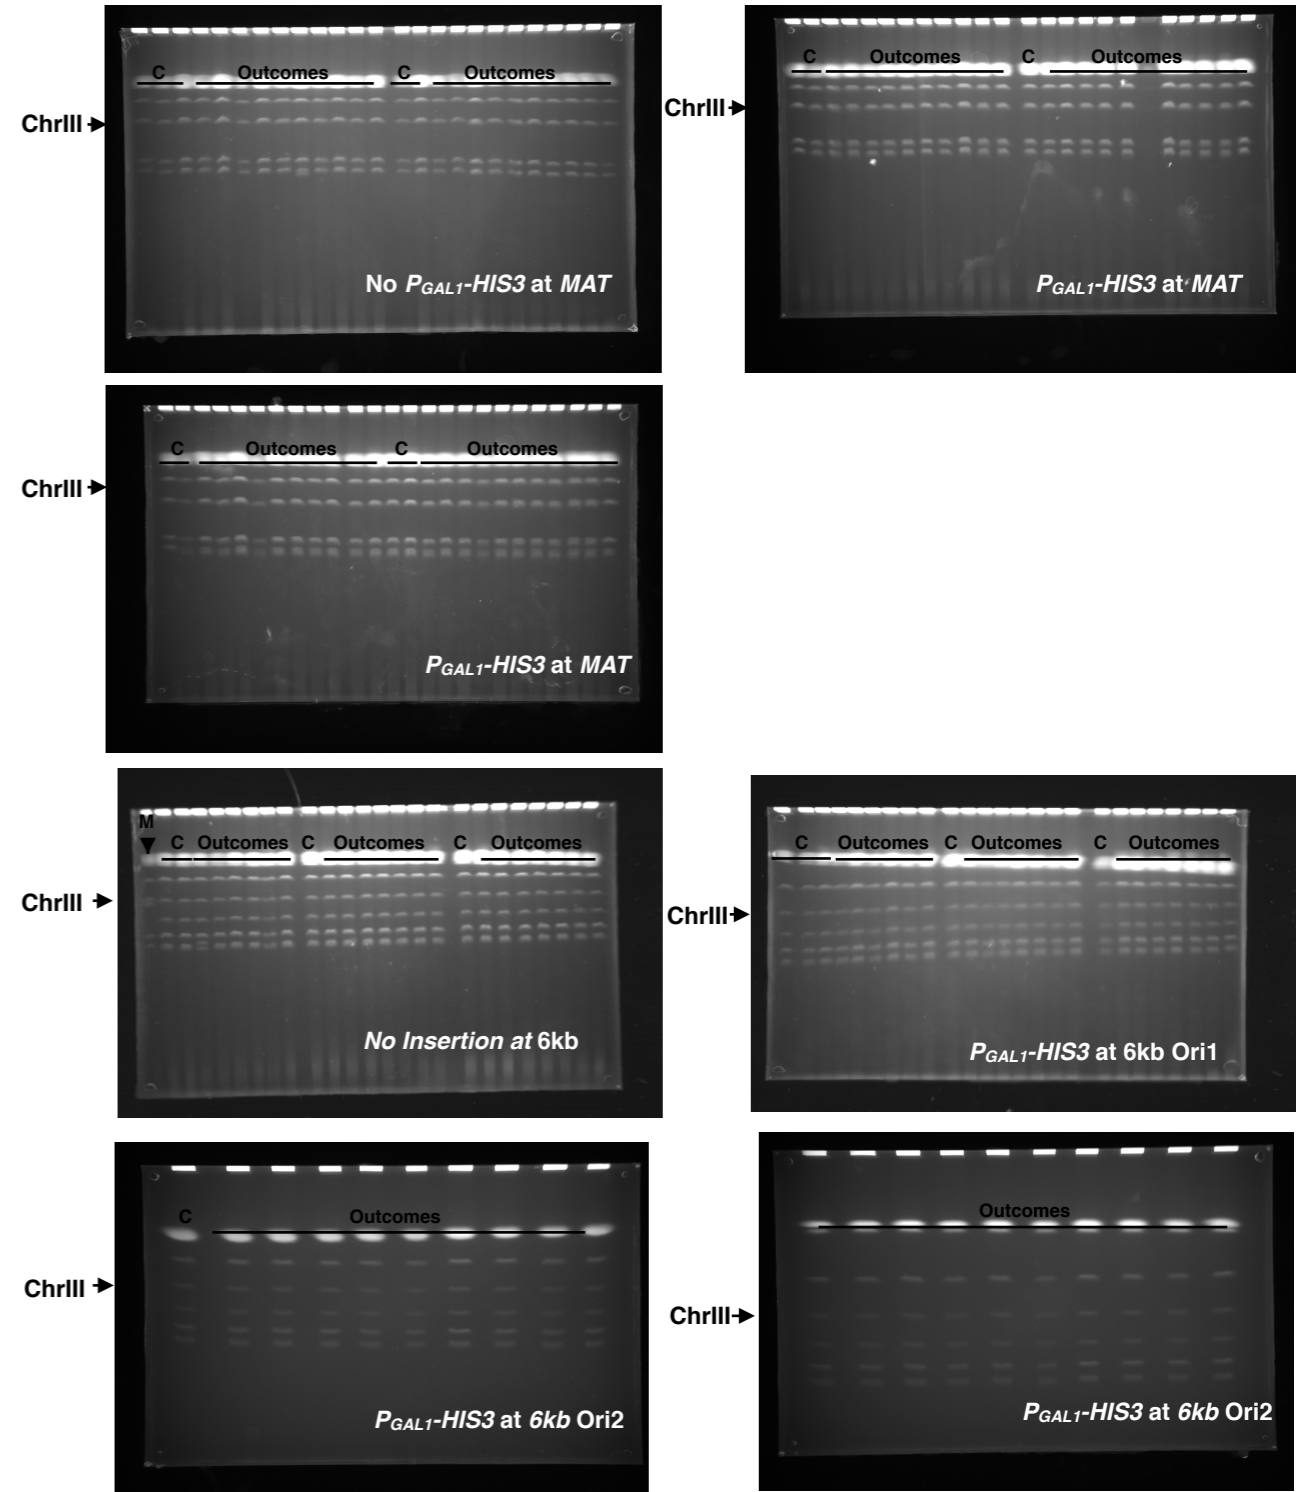

**C:** Parental strains that were placed on YEPD media (no high transcription at  $P_{GAL1-HIS3}$  inserted at ChrIII) were used as a control (C) to compare with outcomes from YEP-Galactose media (high transcription at  $P_{GAL1-HIS3}$  was induced).
